# Supplementary material for: Establishment of stable iPS-derived human neural stem cell lines suitable for cell therapies
Source: PubMed Central journal article supplement (PMC6141489; doi:10.1038/s41419-018-0990-2), 2018-09-17
Supplement: 41419_2018_990_MOESM7_ESM.pdf [file 41419_2018_990_MOESM7_ESM.pdf]

| <b>Primers</b>                 |               |                                                                                                    |
|--------------------------------|---------------|----------------------------------------------------------------------------------------------------|
|                                | <b>Target</b> | <b>Forward/Reverse primer (5'-3')</b>                                                              |
| <i>Episomal genes</i>          | <i>eOCT4</i>  | <i>Fwd: CAT TCA AAC TGA GGT AAG GG<br/>Rev: TAG CGT AAA AGG AGC AAC ATA G</i>                      |
|                                | <i>eKLF4</i>  | <i>Fwd: CCA CCT CGC CTT ACA CAT GAA GA<br/>Rev: TAG CGT AAA AGG AGC AAC ATA G</i>                  |
|                                | <i>eLIN28</i> | <i>Fwd: AGC CAT ATG GTA GCC TCA TGT CCG C<br/>Rev: TAG CGT AAA AGG AGC AAC ATA G</i>               |
|                                | <i>eL-MYC</i> | <i>Fwd: GGC TGA GAA GAG GAT GGC TAC<br/>Rev: TTT GTT TGA CAG GAG CGA CAA T</i>                     |
|                                | <i>eSOX2</i>  | <i>Fwd: TTC ACA TGT CCC AGC ACT ACC AGA<br/>Rev: TTT GTT TGA CAG GAG CGA CAA T</i>                 |
| <i>Pluripotency genes</i>      | <i>OCT4</i>   | <i>Fwd: CCC CAG GGC CCC ATT TTG GTA CC<br/>Rev: ACC TCA GTT TGA ATG CAT GGG AGA GC</i>             |
|                                | <i>KLF4</i>   | <i>Fwd: ACC CAT CCT TCC TGC CCG ATC AGA<br/>Rev: TTG GTA ATG GAG CGG CGG GAC TTG</i>               |
|                                | <i>LIN28</i>  | <i>Fwd: AGC CAT ATG GTA GCC TCA TGT CCG C<br/>Rev: TCA ATT CTG TGC CTC CGG GAG CAG<br/>GGT AGG</i> |
|                                | <i>L-MYC</i>  | <i>Fwd: GCG AAC CCA AGA CCC AGG CCT GCT CC<br/>Rev: CAG GGG GTC TGC TCG CAC CGT GAT G</i>          |
|                                | <i>SOX2</i>   | <i>Fwd: TTC ACA TGT CCC AGC ACT ACC AGA<br/>Rev: TCA CAT GTG TGA GAG GGG CAG TGT GC</i>            |
| <i>House-Keeping Genes</i>     | <i>18S</i>    | <i>Fwd: GGC CCT GTA ATT GGA ATG AGT C<br/>Rev: CCA AGA TCC AAC TAC GAG CTT</i>                     |
| <i>Differentiation Markers</i> | <i>NESTIN</i> | <i>Hs04187831_g1</i>                                                                               |
|                                | <i>PAX6</i>   | <i>Hs00240871_m1</i>                                                                               |
|                                | <i>EOMES</i>  | <i>Hs00172872_m1</i>                                                                               |
|                                | <i>T</i>      | <i>Hs00610080_m1</i>                                                                               |
|                                | <i>GATA4</i>  |                                                                                                    |

|  |              |                      |
|--|--------------|----------------------|
|  | <i>FOXA2</i> | <i>Hs00171403_m1</i> |
|  | <i>18S</i>   | <i>Hs00232764_m1</i> |
|  |              | <i>Hs03003631_g1</i> |

Table 1
